## The tetrapeptide sequence of IL-1 $\beta$ regulates its recruitment and activation by inflammatory caspases

Patrick M. Exconde<sup>1#</sup>, Claudia Hernandez-Chavez<sup>1#</sup>, Mark B. Bray<sup>1</sup>, Jan L. Lopez<sup>3</sup>, Tamanna Srivastava<sup>1</sup>, Marisa S. Egan<sup>2</sup>, Jenna Zhang<sup>2</sup>, Sunny Shin<sup>2</sup>, Bohdana M. Discher<sup>1</sup>, & Cornelius Y. Taabazuing<sup>1\*</sup>

### Affiliations:

<sup>1</sup> Department of Biochemistry and Biophysics, University of Pennsylvania Perelman School of Medicine, Philadelphia, Pennsylvania, USA.

<sup>2</sup> Department of Microbiology, University of Pennsylvania Perelman School of Medicine, Philadelphia, Pennsylvania, USA.

<sup>3</sup> Present address: Department of Biology, Boston University, Boston, Massachusetts, USA.

# Patrick M. Exconde and Claudia Hernandez-Chavez contributed equally to this work.

\*Correspondence to Cornelius Y. Taabazuing:  
[Cornelius.taabazuing@penmedicine.upenn.edu](mailto:Cornelius.taabazuing@penmedicine.upenn.edu)

1 **Abstract**

2 The mammalian innate immune system uses germline-encoded cytosolic pattern-recognition  
3 receptors (PRRs) to detect intracellular danger signals. At least six of these PRRs are known to  
4 form multiprotein complexes called inflammasomes which activate cysteine proteases known as  
5 caspases. Canonical inflammasomes recruit and activate caspase-1 (CASP1), which in turn  
6 cleaves and activates inflammatory cytokines such as IL-1 $\beta$  and IL-18, as well as the pore  
7 forming protein, gasdermin D (GSDMD), to induce pyroptotic cell death. In contrast, non-  
8 canonical inflammasomes, caspases-4/-5 (CASP4/5) in humans and caspase-11 (CASP11) in  
9 mice, are activated by intracellular LPS to cleave GSDMD, but their role in direct processing of  
10 inflammatory cytokines has not been established. Here we show that active CASP4/5 directly  
11 cleave IL-18 to generate the active species. Surprisingly, we also discovered that CASP4/5/11  
12 cleave IL-1 $\beta$  at D27 to generate a 27 kDa fragment that is predicted to be inactive and cannot  
13 signal to the IL-1 receptor. Mechanistically, we discovered that the sequence identity of the P4-  
14 P1 tetrapeptide sequence adjacent to the caspase cleavage site (D116) regulates the  
15 recruitment and processing of IL-1 $\beta$  by inflammatory caspases to generate the bioactive  
16 species. Thus, we have identified new substrates of the non-canonical inflammasomes and  
17 reveal key mechanistic details regulating inflammation.

18

19

20 **Keywords:** non-canonical inflammasomes, caspase-1, caspase-4, caspase-5, IL-1 $\beta$ , IL-18,  
21 cytokines

22

23

24

25

## 26 Introduction

27 The mammalian innate immune system uses germline-encoded pattern recognition receptors  
28 (PRRs) to detect pathogen-associated molecular patterns (PAMPs) or damage-associated  
29 molecular patterns (DAMPs)<sup>1,2</sup>. Upon detecting PAMPs or DAMPs, some of these PRRs rapidly  
30 assemble into multi-protein complexes termed inflammasomes<sup>1,2</sup>. Canonical inflammasome  
31 assembly typically involves recruitment of the adapter protein ASC and then pro-caspase-1  
32 (pro-CASP1) to the PRR, which leads to oligomerization and auto-proteolytic maturation of pro-  
33 CASP1 into the active species. Active CASP1 then processes the inflammatory cytokines IL-1 $\beta$   
34 and IL-18 into their bioactive forms, as well as the pore forming protein, gasdermin D  
35 (GSDMD)<sup>3-5</sup>. GSDMD processing liberates the N-terminus from the inhibitory C-terminal  
36 fragment, allowing the N-terminus to oligomerize and form pores in the plasma membrane to  
37 facilitate the release of cytokines and induce pyroptotic cell death<sup>6-8</sup>.

38 During canonical inflammasome activation, pro-CASP1 undergoes auto-proteolysis at  
39 multiple sites to generate distinct species (**Fig. 1A**)<sup>9-12</sup>. It is thought that IDL processing confers  
40 full protease activity to the inflammatory caspases<sup>9,12-14</sup>. In support of this idea, recent studies  
41 suggest that the CASP1 p33/10 species is the active species in cells and the p20/10 rapidly  
42 loses protease activity<sup>9</sup>. However, ASC, which facilitates full autoproteolysis of pro-CASP1 into  
43 the p20/10 species, is required for IL-1 $\beta$  processing for reasons that are not clear<sup>10,11</sup>. Current  
44 structural studies also suggest that the CASP1 p20/10 is the species that binds GSDMD<sup>15,16</sup>. Of  
45 note, CASP1 p20/10 was demonstrated to bind GSDMD through exosite interactions, but how  
46 CASP1 recognizes other substrates such as IL-1 $\beta$  and IL-18 remains an open question.

47 In contrast to the canonical inflammasome pathway, non-canonical inflammasome  
48 activation involves direct detection of cytosolic lipopolysaccharide (LPS) from gram-negative  
49 bacteria by caspases-4/5 (CASP4/5) in humans and caspase-11 (CASP11) in mice<sup>17-20</sup>. Binding  
50 of LPS induces oligomerization and autoproteolytic maturation of the non-canonical

51 inflammasomes (CASP4/5/11) to generate the active proteases<sup>13,14,21</sup>. Active CASP4/5/11 then  
52 cleave GSDMD to induce pyroptotic cell death. Formation of GSDMD pores during non-  
53 canonical inflammasome activation results in K<sup>+</sup> efflux, which activates CASP1 to induce IL-1 $\beta$   
54 and IL-18 processing via the canonical NLRP3 inflammasome<sup>22,23</sup>. Interestingly, both CASP4  
55 and CASP11 have been implicated in IL-18 processing, but as the canonical pathway is  
56 activated downstream, whether this is a direct processing event in cells or if CASP5, which is  
57 thought to be functionally similar to CASP4, can analogously process IL-18 remains to be  
58 defined<sup>24-27</sup>. Furthermore, like CASP1, autoproteolyzed CASP4/11 were also reported to utilize  
59 exosite mediated interactions for GSDMD binding, but if and how the non-canonical  
60 inflammasomes interact with other putative substrates such as IL-18 is unknown. The  
61 contributions of the different inflammatory caspase species and mechanisms employed for  
62 substrate recognition and processing need to be clearly defined as this has important  
63 ramifications for innate immune regulation.

64 Here, we used a combination of biochemistry and chemical biology to uncover the  
65 substrates cleaved by specific caspase species and to test the role of non-canonical  
66 inflammasomes in cytokine maturation. We discovered that distinct inflammatory caspase  
67 species interact with specific substrates with varying affinities, which likely regulates substrate  
68 processing. Interestingly, we discovered that both CASP4/5 cleave IL-18 directly, but CASP11 is  
69 unable to cleave IL-18. Surprisingly, we also discovered that CASP4/5/11 cleave IL-1 $\beta$  to  
70 generate a 27 kDa fragment that was previously reported to abrogate signaling to the IL-1  
71 receptor<sup>28</sup>. Importantly, we demonstrate that the inflammatory caspases recognize the P4-P1  
72 tetrapeptide sequence adjacent to the IL-1 $\beta$  processing site (D116) to facilitate binding and  
73 processing. Altogether, we identified new direct substrates of the non-canonical inflammasome  
74 pathway and uncovered the molecular regulation governing cytokine processing by the  
75 inflammatory caspases.

76 **RESULTS**

77 **The p20/10 species of human inflammatory caspases are the species that bind strongly**  
78 **to inflammatory substrates.**

79 The inflammatory caspases are comprised of a CARD domain, followed by a 20 kDa large  
80 catalytic subunit (LS), and a 10 kDa small subunit (SS) (**Fig. 1A**). During activation,  
81 autoproteolytic maturation first occurs at the interdomain linker (IDL) which joins the LS and SS  
82 to generate the active p33/10 species for CASP1, p31/10 species for CASP4, and a p38/10  
83 species for CASP5 (**Fig. 1A**)<sup>9,12</sup>. Because IDL cleavage generates a CARD-LS that is ~35 kDa  
84 when averaged, we will henceforth refer to the p35/10 when referencing them collectively for  
85 conceptual ease. Next, autoproteolysis at the CARD-domain linker (CDL), which joins the  
86 CARD-domain and LS, generates the fully matured p20/10 species for CASP1, p19/10 species  
87 for CASP4, and p22/10 species for CASP5 (**Fig. 1A**). We will hereafter refer to them as the  
88 p20/10 species when discussing them collectively. As these distinct species may have different  
89 substrate specificities, we first wanted to determine at what point during activation does the  
90 inflammasome interact with specific substrates. Expression of the large and small subunits of  
91 inflammatory caspases as separate polypeptides results in formation of the active species<sup>16</sup>. We  
92 first generated plasmids that allowed us to express the different subunits of CASP1/4/5 as  
93 separate polypeptides using a single plasmid. This granted us the ability to express the different  
94 active species of each inflammatory caspase in the absence of any stimulating ligand for  
95 functional interrogation. We transiently expressed the catalytically inactive (cysteine to alanine  
96 mutants) of the different CASP1/4/5 species harboring a 2xFLAG N-terminal tag in HEK 293T  
97 cells ectopically expressing GSDMD-V5 and IL-1 $\beta$ -Myc, or HEK 293T cells expressing IL-18-V5  
98 (**Fig. 1B-G**). The lysates were collected and subjected to anti-FLAG immunoprecipitation. As  
99 expected, the CASP1 p20/p10 species bound GSDMD, IL- $\beta$  (**Fig. 1B**), and IL-18 (**Fig. 1C**).

100 GSDMD and IL-1 $\beta$  were bound weakly to CASP1 p33/10 but we could not detect any binding of  
101 IL-18 to CASP1 p33/10 (**Fig. 1B,C**).

102 We then probed for binding of the human non-canonical caspases to the inflammatory  
103 substrates (GSDMD, IL-1 $\beta$ , and IL-18). We could not detect binding of GSDMD and IL-1 $\beta$  to any  
104 of the CASP4 species tested in this assay (**Fig. 1D**). However, we detected binding of IL-18 to  
105 CASP4 p19/10 (**Fig. 1E**). During this work, we noticed that the CASP1 p12/10 antibody (Abcam)  
106 had significant cross reactivity with the CASP4 p10 subunit. We therefore used this antibody to  
107 check the expression of CASP4 p10 as no commercially available antibody exists that detects  
108 the p10. Unfortunately, none of the CASP5 antibodies we tried detected the p10 subunit.  
109 Notably, CASP4 p10, which was expressed separately, was pulled down by the p19 subunit,  
110 suggesting that a functional enzyme complex was formed, but the complex did not interact  
111 strongly with GSDMD and IL-1 $\beta$ . Similarly, IL-18 was bound to CASP5 p22/10 and we detected  
112 modest binding of GSDMD, but not IL-1 $\beta$  to CASP5 p22/10 (**Fig. 1F,G**). It is worth noting that no  
113 processing of GSDMD, IL-1 $\beta$ , or IL-18 was observed with expression of the catalytically inactive  
114 caspase species. Taken together, this data suggests that the auto proteolyzed p20/10 species  
115 of CASP4/5 binds strongly to IL-18, but only form weak interactions with GSDMD and IL-1 $\beta$ .

116

### 117 **CASP4/5 cleave IL-1 $\beta$ and IL-18**

118 We next sought to investigate the functional impact of the distinct caspase species on  
119 inflammatory substrate processing. We hypothesized that when the distinct species are present  
120 at the same levels in cells, the p20/10 species would be the most active species given that they  
121 exhibited the strongest binding to the inflammatory substrates. We thus expressed the  
122 catalytically competent p35/10 and p20/10 constructs of CASP1,-4, and -5 as separate  
123 polypeptides in the HEK 293T cells stably expressing the inflammatory substrates described  
124 above. To prevent processing of the p35 constructs, we made the corresponding CDL mutations

125 for CASP1 (D103A, D119A), CASP4 (D59A, D80A, D104A), and CASP5 (D137A) to generate  
126 constitutive p35/10 enzymes. Transient transfection of the p35/10 or p20/10 species in HEK  
127 293T cells expressing GSDMD and IL-1 $\beta$  resulted in significant LDH release for all species (**Fig.**  
128 **2A**) except for CASP5 p20/10, which was expressed at lower levels (**Fig. 2B**). Notably, the  
129 CASP1 and CASP4 p35/10 and p20/10 species were expressed at relatively comparable levels,  
130 but we consistently saw less expression of CASP5 p22/10 species, suggesting CASP5 p22/10  
131 may be unstable when expressed. In agreement with the p20/10 species being the species that  
132 bind strongly to the inflammatory substrates, we observed slightly higher LDH release for these  
133 species compared to the p35/10 species (**Fig. 2A**). Intriguingly, all the active species seemed to  
134 induce some apoptosis as evidenced by PARP cleavage, but only the CASP1 p33/10 and  
135 p20/10 species robustly processed IL-1 $\beta$  and GSDMD (**Fig. 2B**). Both the CASP4 p31/10 and  
136 p19/10 species had some slight GSDMD processing, but we could not detect GSDMD  
137 processing for CASP5 (**Fig. 2B**). Surprisingly, CASP4 also cleaved IL-1 $\beta$  to generate the active  
138 17 kDa fragment, but this processing event was minor compared to CASP1 (**Fig. 2B**).  
139 Unexpectedly, we also observed a 27 kDa cleavage product of IL-1 $\beta$  in CASP4 and CASP5  
140 transfected cells (**Fig. 2B**). We note that CASP5 p22/10 was expressed less in this assay, and  
141 although we could not detect the p10 subunit using an antibody, we could confirm expression  
142 based on functional processing of substrates.

143 We next expressed the caspase species in HEK 293T cells stably expressing IL-18 and  
144 as expected for cells lacking GSDMD<sup>29</sup>, there was PARP processing, indicating that the  
145 caspases induced apoptosis in the absence of GSDMD. We note that some PARP processing  
146 also occurred in the GSDMD expressing cells, signifying that both apoptosis and pyroptosis  
147 pathways can be engaged if there is enough of the functional enzyme species present. Of note,  
148 a recent study identified caspase-7 as a substrate of CASP4, implying there may be crosstalk  
149 between the non-canonical inflammasome pathway and the apoptotic pathway<sup>30</sup>. There was

150 LDH release in the GSDMD deficient cells due to secondary necrosis but it was less than the  
151 LDH released in GSDMD expressing cells (**Fig. 2C**)<sup>5,29,31</sup>. Remarkably, all active caspase  
152 species seemed to process IL-18 equivalently (**Fig. 2D**). To gain more insight into the molecular  
153 basis of why CASP4/5 did not cleave IL-1 $\beta$  or GSDMD as efficiently as CASP1 but cleaved IL-  
154 18 as efficiently, we compared the binding of these substrates to the p20/10 species, which bind  
155 inflammatory substrates strongly. In agreement with our previous data, neither CASP4 p19/10  
156 nor CASP5 p22/10 bound GSDMD or IL-1 $\beta$  as strongly as CASP1 p20/10 (**Fig. 2E**). Conversely,  
157 more IL-18 was bound to both CASP4 p19/10 and CASP5 p22/10 compared to CASP1 p20/10  
158 (**Fig. 2F**), suggesting that this increased binding compared to CASP1 permits processing to the  
159 same degree as CASP1. This data implies that CASP4/5 may preferentially cleave IL-18 before  
160 other substrates in cells.

161

## 162 **The P4–P1 tetrapeptide sequence of IL-1 $\beta$ regulates processing by inflammatory** 163 **caspsases**

164 Recent *in vitro* work using recombinant CASP4/5 demonstrated that the identity of the residues  
165 adjacent to the caspase cleavage site can influence the processing of substrates<sup>32,33</sup>. While  
166 some enhancement in the catalytic efficiency of non-canonical inflammasomes for processing  
167 IL-18 was achieved by substituting the P1'–P4' region with the sequence of GSDMD, these  
168 substitutions in IL-1 $\beta$  had limited effect on catalysis<sup>32</sup>. This raises 3 possibilities that are not  
169 mutually exclusive: 1) the P4–P1 (rather than the P1'–P4') region is the major determinant of IL-  
170 1 $\beta$  catalysis, 2) the GSDMD sequence is not the optimal sequence for enhancing catalysis, or 3)  
171 some other structural features modulate IL-1 $\beta$  recognition and catalysis, such as an exosite.  
172 Interestingly, the processing of GSDMD by inflammatory caspases was shown to be sequence  
173 independent and instead relied on recognition of an exosite<sup>16</sup>. We wondered if processing of IL-  
174 1 $\beta$  was similarly sequence independent. We reasoned that processing of IL-1 $\beta$  at the canonical



175 site (D116) would be sequence dependent since CASP4/5 engaged and processed IL-1 $\beta$  at an  
176 alternative site to generate a 27 kDa (IL-1 $\beta$  p27) fragment, but not the p17 fragment (**Fig. 2B**).  
177 To test this, we mutated the P4–P1 tetrapeptide sequence of IL-1 $\beta$  to match the tetrapeptide  
178 sequence of known caspase substrates (**Fig. 3A**). For example, CASP1 cleaves wildtype IL-1 $\beta$   
179 (IL-1 $\beta^{\text{WT}}$ ) at D116, which harbors a YVHD<sub>116</sub> sequence. We mutated the YVHD sequence to  
180 LESD to match the tetrapeptide sequence of IL-18, to generate IL-1 $\beta^{\text{LESD}}$ . We mutated YVHD to  
181 IAND (IL-1 $\beta^{\text{IAND}}$ ) to match the tetrapeptide sequence of IL-1 $\alpha$ , which was reported to be  
182 processed by CASP5<sup>34</sup>, and generated an IL-1 $\beta^{\text{AAAD}}$  mutant which abolished all specificity. All  
183 the IL-1 $\beta$  tetrapeptide mutants were HA-tagged at the C-terminus. We transiently co-expressed  
184 the IL-1 $\beta$  tetrapeptide mutants with the catalytically active caspase p20/10 constructs in HEK  
185 293T cells expressing GSDMD-V5 and IL-1 $\beta^{\text{WT}}$ -Myc (**Fig. 3B**). As previously observed, only  
186 CASP1 p20/10 significantly processed IL-1 $\beta$  into the p17 fragment (**Fig. 3B**). In support of our  
187 hypothesis, we observed that IL-1 $\beta^{\text{LESD}}$  was processed by CASP1/4/5 into the active p17  
188 fragment (**Fig. 3B**). Notably, processing of IL-1 $\beta^{\text{AAAD}}$  into the p17 fragment was significantly  
189 attenuated for all caspases, including CASP1. CASP1 was able to process IL-1 $\beta^{\text{IAND}}$  to generate  
190 the p17 fragment, but CASP1 also generated a substantial amount of the alternatively  
191 processed p27 fragment, suggesting that processing at the canonical site (D116) was  
192 suboptimal (**Fig 3B**). Intriguingly, despite CASP5 being reported to cleave IL-1 $\alpha$ , CASP5 p22/10  
193 failed to cleave IL-1 $\beta^{\text{IAND}}$  to generate the p17 product but rather, generated the p27 product (**Fig.**  
194 **3B**). These findings suggested that CASP5 may not cleave IL-1 $\alpha$ , and indeed, we did not  
195 observe processing of wildtype IL-1 $\alpha$  by any of the caspases when activated by overexpression  
196 or using an inducible system (described below) (**Supplemental Fig. S1 A,B**).

197 We next wanted to determine the molecular basis governing the processing of IL-1 $\beta^{\text{LESD}}$   
198 by the inflammatory caspases to generate the bioactive p17 fragment but not the other

199 tetrapeptide mutants. Given that wildtype IL-18 binds CASP4/5 strongly, we hypothesized that  
200 IL-1 $\beta$ <sup>LESD</sup> would have increased binding to CASP4/5 compared to IL-1 $\beta$ <sup>WT</sup>. We co-transfected IL-  
201 1 $\beta$ <sup>LESD</sup> with the catalytically inactive caspases and performed anti-FLAG immunoprecipitations to  
202 assess binding. Consistent with our hypothesis, we did not detect binding of wildtype IL-1 $\beta$  to  
203 CASP4/5 (**Fig. 1D,F**) but we detected binding of IL-1 $\beta$ <sup>LESD</sup> to CASP4 p19/10 and CASP5 p22/10  
204 (**Fig. 3C**). Taken together, this data suggests that the tetrapeptide motif of IL-1 $\beta$  plays a critical  
205 role in regulating its molecular interactions with inflammatory caspases to fine tune  
206 inflammation.

207

### 208 **Caspase activation by dimerization is sufficient to cleave inflammatory substrates**

209 The consensus mechanism for initiator caspase activation involves initial dimerization, which  
210 allows the caspase to gain basal activity for itself, leading to IDL autoproteolysis and  
211 subsequent maturation<sup>35</sup>. Recently, the DmrB dimerization system has been used to induce the  
212 dimerization and activation of caspases<sup>12,13</sup>. Briefly, replacing the CARD domain of the caspase  
213 with the DmrB domain enables precise and controlled dimerization and activation in the  
214 presence of the small molecule AP20187. To further probe the processing of inflammatory  
215 substrates, we generated HEK 293T cells stably expressing either GSDMD-V5 or IL-18-V5  
216 along with either  $\Delta$ CARD DmrB-CASP1,-4, or -5 (hereafter referred to as DmrB-CASP1/4/5).  
217 We treated these cells with AP20187 for 1 hour or 24 hours, and in agreement with our previous  
218 data, we observed GSDMD (**Fig. 4A**) and IL-18 (**Fig. 4B**) processing. Although there was some  
219 GSDMD processing within 1 h, we did not detect LDH release within this timeframe, but LDH  
220 release was observed at 24 hours. Of note, DmrB-CASP1 exhibited the highest LDH release in  
221 both cell lines (**Fig. 4A,B**) and was the only one that induced apoptosis that progressed to  
222 secondary necrosis in cells expressing IL-18 (**Fig. 4B**). In agreement with the LDH release and  
223 our prior data, DmrB-CASP1 had more GSDMD processing than DmrB-CASP4 and DmrB-

224 CASP5. However, DmrB-CASP5 processed IL-18 nearly to the same degree as DmrB-CASP1  
225 within 1 hour, and all caspases processed IL-18 after 24 hours (**Fig. 4B**). We next assessed the  
226 processing of IL-1 $\beta$  and the tetrapeptide mutants using the DmrB-caspases. We transiently  
227 transfected wildtype or the IL-1 $\beta$  tetrapeptide mutants into HEK 293T cells expressing GSDMD-  
228 V5 and DmrB-CASP1,-4, or -5, then treated with AP20187 for 24 hours (**Fig. 4C**). Only DmrB-  
229 CASP1 cleaved IL-1 $\beta^{\text{WT}}$  at the canonical site to yield the p17 fragment. However, IL-1 $\beta^{\text{LESD}}$  was  
230 equivalently processed by DmrB-CASP1/4/5, and none of the caspases cleaved IL-1 $\beta^{\text{AAAD}}$  or IL-  
231 1 $\beta^{\text{IAND}}$  (**Fig. 4C**). This orthogonal method of caspase activation confirms that CASP4/5 do not  
232 process GSDMD as efficiently as CASP1, but IL-18 maturation occurs nearly as efficiently with  
233 CASP4/5 as with CASP1. Furthermore, these results reaffirm that the P4-P1 tetrapeptide motif  
234 of IL-1 $\beta$  regulates processing by inflammatory caspases.

235 CASP11 is considered the mouse ortholog of human CASP4/5. We wondered if there  
236 were differences between the mouse and human non-canonical inflammasomes in their ability  
237 to process cytokines. To address this, we generated HEK 293T cells stably expressing  $\Delta$ CARD  
238 DmrB-CASP11 and transiently transfected mouse Gsdmd (mGsdmd), IL-1 $\beta$  (mIL-1 $\beta$ ), IL-18  
239 (mIL-18), or human IL-18 (hIL-18) into the cells. After 24 h post transfection, DmrB-CASP11  
240 was activated with AP20187 for 24 h then samples were analyzed for LDH release and  
241 immunoblotting (**Fig. 4D**). As expected, the addition of AP20187 induced pyroptosis in the  
242 mGsdmd transfected cells, as evidenced by LDH release and mGsdmd processing into the  
243 pyroptosis-inducing p30 fragment (**Fig. 4D**). Notably, DmrB-CASP11 induced mIL-1 $\beta$   
244 processing at an alternative site to yield the deactivated p27 fragment, but not the active p17  
245 fragment (**Fig. 4D**). Unlike CASP4/5, DmrB-CASP11 failed to significantly process IL-18 into the  
246 bioactive mature species (**Fig. 4D**), suggesting a functional divergence between mouse and  
247 human non-canonical inflammasomes.

248

249 **LPS activated non-canonical inflammasomes cleave IL-1 $\beta$  and IL-18**

250 The non-canonical inflammasomes are activated by intracellular LPS<sup>17–20</sup>. We next sought to  
251 determine if activation by the native ligand (LPS) would induce cytokine processing. We  
252 transiently transfected LPS into HEK 293T cells expressing CASP4/5 or 2xFLAG-CASP4/5 and  
253 IL-18. We detected processing of IL-18 into mature IL-18 in LPS-transfected cells (**Fig. 5A**).  
254 Moreover, the presence of the N-terminal 2x-FLAG tag did not affect the activity of CASP4/5 as  
255 the maturation of IL-18 was comparable to that of the untagged CASP4/5-expressing cells (**Fig.**  
256 **5A**).

257 Our results with DmrB-CASP11 indicate that CASP11 cleaves IL-1 $\beta$  but not IL-18. We  
258 wanted to determine if LPS-activated CASP11 would similarly cleave IL-1 $\beta$  to generate the p27  
259 fragment, but not cleave IL-18. We transiently transfected the inflammatory substrates into HEK  
260 293T cells stably expressing 2x-FLAG CASP11 and activated with LPS. Analogous to the  
261 DmrB-CASP11 results, LPS activated CASP11 induced pyroptosis, as determined by GSDMD  
262 processing and LDH release (**Fig. 5B,C**). Importantly, LPS-activated CASP11 processed mIL-  
263 1 $\beta$  to yield the p27 fragment, but not the active p17 fragment, and failed to process IL-18 (**Fig.**  
264 **5C**). Altogether, this data implies that the inactivation of IL-1 $\beta$  signaling is conserved between  
265 humans and mice, but the activation of IL-18 is not.

266

267 **Non-canonical inflammasome activation induces IL-1 $\beta$  and IL-18 processing in human**  
268 **macrophages and epithelial cells.**

269 The non-canonical inflammasomes are expressed in both myeloid and epithelial cells and have  
270 a well-documented function in playing an important role in mediating host protection against  
271 invading pathogens<sup>17,19,24–26</sup>. While epithelial cells express IL-18, there is limited IL-1 $\beta$   
272 expression even with toll-like receptor (TLR) stimulation<sup>26,36,37</sup>. On the other hand, monocytes  
273 and macrophages robustly express IL-1 $\beta$  upon TLR stimulation, which can occur during

274 infection with gram negative bacteria<sup>36</sup>. To gain insight into the function of non-canonical  
275 inflammasomes in different cell types, we sought to determine the activity of CASP4/5 in more  
276 physiologically relevant cells. We first differentiated THP1 cells into macrophages, primed with  
277 LPS to ensure IL-1 $\beta$  expression, then transfected with LPS to induce endogenous CASP4/5  
278 activation. As anticipated, LPS induced significant LDH release in control and *CASP1* knockout  
279 (KO) cells, indicating CASP4/5-mediated pyroptosis (**Fig. 6A**). Indeed, LPS-transfected THP1  
280 macrophages displayed GSDMD processing in both control and *CASP1* KO cells (**Fig. 6B**). To  
281 delineate the contribution of CASP4/5 to IL-1 $\beta$  and IL-18 processing in macrophages, we  
282 treated the cells with a broad-spectrum pharmacological inhibitor (ZVAD) that targets all  
283 caspases, and an inhibitor that is more specific for CASP1 (VX765)<sup>38,39</sup>. We then transfected  
284 LPS to activate CASP4/5 and 24 hours later, separated the supernatants and lysates for  
285 analysis by immunoblotting. During pyroptosis, inflammatory substrates are released into the  
286 supernatant through the gasdermin pores, so we expected to see the processed substrates in  
287 the supernatants. In accord with this, activation of CASP4/5 in control cells led to robust  
288 processing of IL-1 $\beta$  into the p27 fragment, which was nearly completely abrogated by ZVAD,  
289 and significantly attenuated by VX765 (**Fig. 6B**). NLRP3 is activated downstream of non-  
290 canonical inflammasomes, which activates CASP1 to mediate IL-1 $\beta$  processing into the p17  
291 fragment<sup>22,23</sup>. Consistent with this, we also observed IL-1 $\beta$  maturation into the bioactive p17  
292 fragment in control cells, which was completely abrogated by both inhibitors (**Fig. 6B**).

293       Importantly, we observed processing of IL-1 $\beta$  into the p27 fragment in *CASP1* KO cells,  
294 indicating that this processing event results from CASP4/5 activity (**Fig. 6B**). We did not detect  
295 the presence of the mature IL-1 $\beta$  p17 fragment in *CASP1* KO cells, suggesting CASP4/5 do not  
296 induce significant processing of IL-1 $\beta$  at the canonical site in human macrophages (**Fig. 6B**).  
297 Critically, the appearance of the p27 fragment was abrogated in the presence of caspase  
298 inhibitors in *CASP1* KO cells (**Fig. 6B**). It should be noted that pharmacological inhibitors of

299 caspases can cross-react with other caspases and the CASP1 inhibitor VX765 also inhibits  
300 CASP4/5. Similar findings were noted for the release of mature IL-18 into the supernatant. We  
301 observed CASP1-independent release of mature IL-18, which was abrogated by ZVAD and  
302 VX765, signifying that CASP4/5 cleave IL-18 to generate the bioactive species in human  
303 macrophages (**Fig. 6B**).

304 We next wanted to assess whether CASP4/5 mediate processing of IL-1 $\beta$  and IL-18 in  
305 the context of a natural bacterial infection. We therefore infected THP1 macrophages with  
306 *Legionella pneumophila* (hereafter called *Legionella*) and like LPS, *Legionella* infection resulted  
307 in increased LDH release in control and *CASP1* KO cells compared to uninfected cells (**Fig.**  
308 **6C**). *Legionella* infection induced the processing of IL-1 $\beta$  into both the p27 and p17 fragments in  
309 control cells, but only the p27 fragment was generated in *CASP1* KO cells (**Fig. 6D**). We  
310 detected a slight increase in IL-18 processing in *Legionella* infected cells. Collectively, our data  
311 indicates that CASP4/5 directly process IL-1 $\beta$  and IL-18 in macrophages during bacterial  
312 infection.

313 Because prior studies have implicated CASP4/11 in IL-18 processing in epithelial cells,  
314 we wanted to determine the role of non-canonical inflammasome activation on IL-18 processing  
315 in epithelial cells. We thus infected Caco-2 cells with *Salmonella* Typhimurium, which was  
316 previously documented to activate CASP4 in Caco-2 cells<sup>25,26</sup>. Like CASP4/5 activation in  
317 macrophages, *Salmonella* infection induced GSDMD processing and IL-18 maturation and  
318 release into the supernatants (**Fig. 6E**). As previously reported, IL-18 processing was CASP1-  
319 independent and CASP4-dependent (**Fig. 6E**)<sup>25,26</sup>. Taken together, our data suggests that IL-18  
320 is a direct substrate for the non-canonical inflammasomes. However, in certain cell types that  
321 express IL-1 $\beta$ , non-canonical inflammasome activation leads to IL-1 $\beta$  processing at an  
322 alternative site to generate a p27 fragment that was previously reported to be functionally  
323 inactive<sup>28</sup>.

324

### 325 **CASP4/5 process IL-1 $\beta$ at D27 and IL-18 at D36**

326 CASP1 is known to process IL-1 $\beta$  at D27 to generate a fragment that is ~27 kDa<sup>40,41</sup>. We sought  
327 to identify the alternative processing site that gives rise to IL-1 $\beta$  p27. We postulated that CASP1  
328 prefers to cleave IL-1 $\beta$  at D116 to generate IL-1 $\beta$  p17, but CASP4/5 preferentially cleave IL-1 $\beta$   
329 at D27 to generate IL-1 $\beta$  p27. To test this hypothesis, we mutated D27 to alanine and co-  
330 transfected IL-1 $\beta$  D27A (IL-1 $\beta$ <sup>D27A</sup>) with the catalytically active species of CASP1/4/5 into HEK  
331 293T cells. As anticipated, CASP1 p33/10 and p20/10 processed IL-1 $\beta$ <sup>WT</sup> and IL-1 $\beta$ <sup>D27A</sup> to  
332 generate IL-1 $\beta$  p17 whereas CASP4 p31/10 and p19/10 primarily processed IL-1 $\beta$ <sup>WT</sup> to generate  
333 the p27, and modestly generated the p17 fragment (**Fig. 7A**). Notably, CASP4 failed to cleave  
334 IL-1 $\beta$ <sup>D27A</sup> to generate IL-1 $\beta$  p27, demonstrating that D27 is indeed the processing site for CASP4  
335 (**Fig. 7A**). In agreement with our prior data, CASP5 processed IL-1 $\beta$ <sup>WT</sup> and generated only the  
336 p27 fragment, which was abolished in IL-1 $\beta$ <sup>D27A</sup> transfected cells (**Fig. 7A**). We also discovered  
337 that CASP5 cleaves IL-18 and wanted to confirm the site of processing. Because CASP1/4  
338 process IL-18 at D36<sup>40,41</sup> and CASP5 processing of IL-18 generated a fragment that was the  
339 same size as that of CASP1/4 processed IL-18, we hypothesized that CASP5 processed IL-18  
340 at D36. Indeed, CASP1/4/5 processed IL-18<sup>WT</sup> to generate the mature species, which was  
341 abolished in IL-18<sup>D36A</sup> transfected cells (**Fig. 7B**). Thus, our data reveals that the non-canonical  
342 inflammasomes process IL-1 $\beta$  at D27 and IL-18 at D36, establishing IL-1 $\beta$  and IL-18 as bona  
343 fide substrates of the non-canonical inflammasomes (**Fig. 7C**).

344

### 345 **Discussion**

346 All inflammatory caspases are known to cleave the effector protein GSDMD to induce  
347 pyroptosis, but whether these caspases process GSDMD to the same degree when activated in  
348 cells has remained unclear because ligand-mediated activation of inflammatory caspases

349 proceed with different kinetics. For example, lethal factor (LF) and the small molecule drug Val-  
350 boroPro (VbP) are both activators of the NLRP1B inflammasome, but LF-induced pyroptosis  
351 occurs faster than VbP-induced pyroptosis<sup>42,43</sup>. In this study, we developed an expression  
352 system that allowed us to compare the interactions of specific caspase species with their  
353 putative substrates as well as evaluate the activity in cells independent of the kinetics of ligand-  
354 mediated activation. Furthermore, we utilized an orthogonal chemical biology approach to  
355 inducibly dimerize and activate the inflammatory caspases that corroborates the findings from  
356 our expression assays. Importantly, these findings are congruent with results obtained from  
357 activating the inflammatory caspases using native ligands and pathogens in physiologically  
358 relevant cells.

359         Recent studies have reported that the dominant active caspase-1 species in cells is a  
360 transient p33/10 species, and further processing to the p20/10 species generates an unstable  
361 protein that rapidly loses protease activity<sup>9</sup>. Consistent with these findings, several studies have  
362 demonstrated that interdomain linker processing is critical for pyroptosis<sup>9,12-14</sup>. Interestingly,  
363 structural studies demonstrate that the p20/10 species of the inflammatory caspases utilize an  
364 exosite to bind to GSDMD<sup>15,16</sup>. However, the structural basis of how inflammatory caspases bind  
365 to other substrates such as IL-1 $\beta$  and IL-18 are not fully defined. Thus, we sought to  
366 characterize the inflammatory caspase species and their interactions with the inflammatory  
367 substrates, GSDMD, IL-1 $\beta$ , and IL-18. Our data suggests that the p20/10 species of CASP1/4/5  
368 are the species that bind strongly to the inflammatory substrates (**Fig. 1**). However, some  
369 notable differences exist. For example, CASP1 p20/10 binds strongly to GSDMD and IL-1 $\beta$ , and  
370 weakly to IL-18. In contrast, CASP4/5 p20/10 binds strongly to IL-18, and weakly to GSDMD  
371 and IL-1 $\beta$ . Although the p35/10 species displayed weak interactions with the inflammatory  
372 substrates, our data suggests that the weak interactions are sufficient to mediate processing of  
373 these substrates (**Fig. 2**). We note that for CASP1, less of the p33/10 was pulled down in the IP



374 samples and this may account for why there appears to be less binding of the substrates (**Fig.**  
375 **1**). However, it is worth mentioning that less CASP4 p19/10 was pulled down compared to  
376 CASP1 p20/10, but more IL-18 was bound to CASP4 p19/10, suggesting that if a functional  
377 enzyme complex is formed, strongly bound substrates would co-IP with the caspase species  
378 (**Fig. 2F**). Indeed, a functional CASP1 p33/10 enzyme complex was formed as evidenced by the  
379 processing of substrates such as IL-18 and IL-1 $\beta$  and the presence of the p10 in the IP samples  
380 (**Fig. 1,2**). If CASP1 p33/10 can mediate cytokine processing, then a major question is why is  
381 ASC required? ASC acts as a signal amplifier that facilitates full autoproteolysis of pro-CASP1  
382 into the p20/10 species,<sup>10,11,44</sup> precisely the species that binds strongly to the cytokines. ASC  
383 may have additional functions that are important for IL-1 $\beta$  processing, but we postulate that in  
384 part, it helps generate enough of the short-lived p20/10 species that recruits and processes IL-  
385 1 $\beta$ . These differences in substrate binding capabilities likely help to regulate inflammation by the  
386 inflammatory caspases under different pathophysiological conditions. Future studies will help  
387 uncover the role of ASC in cytokine maturation.

388 The non-canonical inflammasomes are critical for host responses to invading gram  
389 negative bacteria. When activated, CASP4/5 in humans and CASP11 in mice, are known to  
390 cleave GSDMD to mediate pyroptosis, but whether other direct substrates of the non-canonical  
391 inflammasomes exist has remained unclear. Here, we discovered that CASP4/5 directly process  
392 IL-18 at D36 to generate the bioactive species. Notably, IL-18 is a potent activator of natural  
393 killer and T cells,<sup>45</sup> thus, processing by CASP4/5 during infection likely confers an advantage for  
394 mounting an immune response. These findings are in line with recent genetic evidence that  
395 CASP4 is required for IL-18 maturation and secretion in epithelial cells during bacterial  
396 infection<sup>24-26</sup>. Furthermore, our data indicates that the ability of CASP4/5 to process IL-18 is not  
397 limited to just epithelial cells, but spans across other cell types, including macrophages (**Fig. 6**).  
398 Intriguingly, while human CASP4/5 robustly process IL-18, the mouse orthologue of CASP4/5,

399 CASP11, is unable to process IL-18 in cells, consistent with *in vitro* reports<sup>32,33</sup>. Recent studies  
400 also suggest CASP11 does not process IL-18 in response to non-canonical agonists,<sup>46</sup> implying  
401 a functional divergence between humans and mice with regard to IL-18 processing. The impact  
402 of this divergence on host responses to bacteria warrants future investigation.

403 Unexpectedly, although we did not detect binding of IL-1 $\beta$  to CASP4/5, we could detect  
404 processing by both CASP4/5 to generate a p27 fragment (Fig. 2,6,7). Remarkably, the p27  
405 fragment of IL-1 $\beta$  was the dominant species generated when CASP4/5 were activated in THP1  
406 macrophages by LPS transfection or with bacterial infection (**Fig. 6**). During the preparation of  
407 this manuscript, another group used DmrB-CASP4 and reported processing of IL-1 $\beta$  to generate  
408 the mature p17 fragment<sup>47</sup>. We also detected modest processing of IL-1 $\beta$  by CASP4 to generate  
409 the p17 fragment, which was significantly less than the p17 fragment generated by CASP1 in  
410 HEK 293T cells (**Fig. 2**). However, we could not detect IL-1 $\beta$  p17 when CASP4/5 were activated  
411 in human macrophages, suggesting this may not be physiologically relevant (**Fig. 6**). It is  
412 possible that the processed p17 fragment generated by CASP4/5 activity was below the limit of  
413 detection in our macrophage assays. Regardless, the fact that we could detect CASP4/5-  
414 mediated processing of IL-1 $\beta$  to the p27 fragment suggests it is the more physiologically  
415 relevant processing event. CASP11 also processed mouse IL-1 $\beta$  to generate a p27 fragment  
416 (**Fig. 5**), implying that the ability to generate IL-1 $\beta$  p27 is at least evolutionarily conserved  
417 between mice and humans – unlike IL-18 processing.

418 The functional impact of non-canonical inflammasome processing of IL-1 $\beta$  into the p27  
419 fragment remains to be determined. It is tempting to speculate that at some point during  
420 evolution, IL-1 $\beta$  signaling was detrimental to the host, and the non-canonical inflammasomes  
421 evolved to deactivate IL-1 $\beta$  signaling. In support of this hypothesis, IL-1 $\beta$  blocking antibodies  
422 were recently demonstrated to significantly reduce the incidence of lung cancer<sup>48</sup>. Notably, pro-  
423 inflammatory cytokines, including IL-1 $\beta$  and IL-18, contribute to the excessive inflammation and

424 pathogenesis of sepsis that leads to organ failure, and blocking these cytokines confers  
425 protection in acute animal models<sup>49</sup>. Also in support of the notion that the non-canonical  
426 inflammasomes may have evolved to attenuate excessive inflammation downstream of bacterial  
427 infections, recent ancestral reconstruction revealed that CASP4/5 evolved after CASP1 from an  
428 ancestral caspase that cleaves IL-1 $\beta$  to yield the p27 fragment, which was reported to not signal  
429 to the IL-1 receptor<sup>28</sup>. We mapped out the processing site that generates IL-1 $\beta$  p27 by the non-  
430 canonical inflammasomes to D27 (**Fig. 7**). However, whether CASP1 can further process IL-1 $\beta$   
431 p27 to generate the mature, active p17 fragment remains unknown. Fascinatingly, extant  
432 Carnivora harbor a CASP4 enzyme scaffold that has CASP1-like substrate specificity<sup>50</sup>.  
433 Perhaps in the Carnivora, IL-1 $\beta$  p17 was detrimental but later became essential for survival, and  
434 thus, Carnivora CASP4 gained CASP1-like activity. Future studies are needed to delineate the  
435 biological contributions of IL-1 $\beta$  p27 and p17 to host defense or regulating inflammation during  
436 bacterial infection.

437 GSDMD is recognized by inflammatory caspases via an exosite, and the processing is  
438 sequence independent<sup>16</sup>. In stark contrast, we discovered that the processing of IL-1 $\beta$  is  
439 sequence dependent. When we substituted the native tetrapeptide sequence of IL-1 $\beta$  for that of  
440 tetrapeptide sequences from other inflammatory caspase substrates, this conferred processing  
441 specificity to that corresponding caspase. Specifically, we substituted the tetrapeptide sequence  
442 of IL-1 $\beta$  (YVHD) for that of IL-18 (LESD), which we demonstrated was processed by CASP4/5,  
443 the mutant IL-1 $\beta$  was then processed by CASP4/5 at that tetrapeptide site (**Fig. 3**). However, if  
444 YVHD is replaced by AAAD, a sequence that has no specificity for a particular caspase, in  
445 contrast to GSDMD, this attenuates processing at that site. Rather than processing at that site  
446 to generate the bioactive p17 fragment, IL-1 $\beta$ <sup>AAAD</sup> was processed at D27 to yield a 27 kDa  
447 fragment that is predicted to be inactive (**Fig. 3**). This reengineering of IL-1 $\beta$  substrate specificity  
448 led us to discover that CASP5, which is reported to cleave IL-1 $\alpha$ <sup>34</sup>, does not process IL-1 $\alpha$  (**Fig.**

449 **S1)**. In fact, we did not observe IL-1 $\alpha$  processing by CASP1/4/5 when activated via different  
450 mechanisms. This is consistent with past and present studies that failed to detect a role for  
451 inflammatory caspases in processing IL-1 $\alpha$ , but instead identified granzyme B and calpains as  
452 the proteases that mediate IL-1 $\alpha$  processing<sup>51,52</sup>. The incongruent findings could arise from the  
453 use of different cell types and *in vitro* vs in cell assays. Altogether, these findings indicate that  
454 the tetrapeptide sequence in IL-1 $\beta$  regulates IL-1 $\beta$  recruitment and processing by CASP1/4/5.  
455 We postulate that peptide inhibitors based on the LESD scaffold from IL-18 may potentially  
456 serve as selective inhibitors of CASP4/5 over CASP1. Future structural studies are necessary to  
457 dissect the molecular basis of distinct IL-1 $\beta$  and IL-18 recognition and processing by  
458 inflammatory caspases.

459 In summary, report two new direct substrates (IL-1 $\beta$  and IL-18) for the non-canonical  
460 inflammasomes. CASP4/5 cleave IL-18 at D36 to generate the bioactive fragment, but process  
461 IL-1 $\beta$  at D27 to yield an inactive p27 fragment (**Fig. 7C**). Additionally, we discovered that  
462 CASP11 similarly processes mIL-1 $\beta$  to generate IL-1 $\beta$  p27 but does not process mIL-18. Finally,  
463 we found that none of the inflammatory caspases process IL-1 $\alpha$ . Hence, the present study  
464 offers mechanistic insight into substrate specificities that could help design new therapies for  
465 inflammatory disorders and aid our understanding of host responses to inflammation and  
466 bacterial infections.

467

## 468 **Materials and Methods**

### 469 **Antibodies and reagents**

470 Antibodies used include: GSDMD Rabbit polyclonal Ab (Novus Biologicals, NBP2-33422),  
471 FLAG® M2 monoclonal Ab (Sigma, F3165), GAPDH Rabbit monoclonal Ab (Cell Signaling  
472 Tech, 14C10), CASP1 p20 Rabbit polyclonal Ab (Cell Signaling Tech, 2225s), CASP1 p12/10  
473 Rabbit monoclonal Ab (Abcam, ab179515), CASP4 Rabbit polyclonal Ab (Cell Signaling Tech,

474 4450S), CASP5 Rabbit monoclonal Ab (Cell Signaling Tech, 46680S), Myc Mouse monoclonal  
475 Ab (Cell Signaling Tech, 2276S), V5 Rabbit monoclonal Ab (Cell Signaling Tech, 13202S), hIL-  
476 1 $\beta$  Goat Polyclonal Ab (R&D systems, AF-201-NA), hIL-18 Goat Ab (R&D systems, af2548),  
477 hIL-1 $\alpha$  Recombinant Ab (PeproTech, 200-01A), PARP Rabbit polyclonal Ab (Cell Signaling  
478 Tech, 9542S), HA Rabbit monoclonal Ab (Cell Signaling Tech, 3724S), mIL-1 $\beta$  Goat polyclonal  
479 Ab (R&D systems, AF-401-NA), CASP11 Rat monoclonal Ab (Novus Biologicals, NB120-  
480 10454), FKBP12 Rabbit polyclonal Ab (Abcam, ab24373). IRDye 800CW anti-rabbit (LICOR,  
481 925-32211), IRDye 800CW anti-mouse (LI-COR, 925-32210), IRDye 680CW anti-rabbit (LI-  
482 COR, 925-68073), IRDye 680CW anti-mouse (LI-COR, 925-68072). Other reagents used  
483 include: LPS-EB Ultrapure (Invivogen, tlrl-3pelps), VX-765 (Apexbio Technology LLC, 50-101-  
484 3604), Z-VAD-FMK (Enzo Life Sciences, NC9471015), FuGENE HD (Promega, E2311),  
485 AP20187 (Tocris™ 6297/5),  
486 NP-40 Lysis Buffer Low Salt (Thomas Scientific, C994H79).

487

## 488 **Cell Culture**

489 HEK 293T cells, HeLa cells, Caco-2 cells, and THP1 cells were purchased from ATCC.  
490 Caco-2 and THP1 knockout cell lines were previously reported<sup>25,29</sup>. HEK 293T and HeLa cells  
491 were cultured in Dulbecco's Modified Eagle's Medium (DMEM) with L-glutamine and 10%  
492 fetal bovine serum (FBS). THP-1 cells were cultured in Roswell Park Memorial Institute  
493 (RPMI) medium 1640 with L-glutamine and 10% fetal bovine serum (FBS). Caco-2 cells  
494 (HTB-27; American Type Culture Collection) were maintained in DMEM supplemented with 10%  
495 FBS, 100 IU/mL penicillin and 100 mg/mL streptomycin. All cells were grown at 37 °C in a 5%  
496 CO<sub>2</sub> atmosphere incubator.

497

## 498 **Generation of stable cell lines.**

499 For generating HEK 293T cells ectopically expressing GSDMD, IL-1 $\beta$ , IL-1 $\alpha$ , IL-18, and caspase  
500 constructs, plasmids encoding those proteins were packaged into lentivirus by transfecting the  
501 vectors (2  $\mu$ g) along with psPAX2 (2  $\mu$ g), and pMD2.G (1  $\mu$ g) using Fugene HD transfection  
502 reagent (Promega) into HEK 293T cells. After 2 days, the supernatants were filtered using a  
503 0.45  $\mu$ m filter, then used to infect HEK 293T cells. After 48 hours, the cells expressing the  
504 indicated constructs were selected with hygromycin (200  $\mu$ g/mL), blasticidin (10  $\mu$ g/mL), or  
505 puromycin (1  $\mu$ g/mL).

506

### 507 **Cloning**

508 All plasmids were cloned using Gateway technology as previously described<sup>12,29,53</sup>. DNA  
509 encoding the indicated proteins were inserted between the *attR* recombination sites and  
510 shuttled into modified pLEX\_307 vectors (Addgene) using Gateway technology (Thermo  
511 Fisher Scientific) according to the manufacturer's instructions. Proteins expressed from these  
512 modified vectors contain an N-terminal *attB1* linker (GSTSLYKKAGFAT) after any N-terminal  
513 tag (2xFLAG) or protein (DmrB) or a C-terminal *attB2* linker (DPAFLYKVVDI) preceding any  
514 C-terminal tag such as V5 or HA. An internal ribosome entry site (IRES) was cloned between  
515 the large and small subunits of the caspases to allow separate expression of the two  
516 polypeptides.  $\Delta$ CARD DmrB-CASP1 (residues 92 – 402),  $\Delta$ CARD DmrB-CASP4 (residues 67  
517 – 377),  $\Delta$ CARD DmrB-CASP5 (residues 128 – 434), and  $\Delta$ CARD DmrB-CASP11 (residues  
518 71 – 373) were all cloned into a modified pLEX\_307 vector and contained the N-terminal  
519 *attB1* linker between the DmrB and caspase sequences. Point mutations were generated  
520 using the QuikChange II site-directed mutagenesis kit (Agilent) according to the  
521 manufacturer's instructions.

522

### 523 **Transient transfections**

524 HEK 293T cells were seeded in 12-well culture plates at  $2.5 \times 10^5$  cells/well in DMEM. The  
525 following day, the indicated plasmids were mixed with a control RFP vector to a total of 1.0  $\mu\text{g}$   
526 DNA in 65  $\mu\text{L}$  Opti-MEM and transfected using FuGENE HD (Promega) according to the  
527 manufacturer's protocol. Some samples were further treated (as indicated in each figure legend)  
528 with AP20187 (1  $\mu\text{M}$ ) or LPS (25  $\mu\text{g}/\text{mL}$ )/FuGENE (0.5%). The cells were harvested at the  
529 indicated times and analyzed by LDH cytotoxicity and immunoblotting assays as described  
530 below.

531

### 532 **LDH cytotoxicity and immunoblotting assays**

533 Supernatants were harvested for LDH analyses at time points indicated and analyzed using the  
534 Cyquant LDH Cytotoxicity Assay (Thermo Scientific) according to the manufacturer's protocol.  
535 LDH activity was quantified relative to a lysis control where cells were lysed using NP-40 for 30  
536 minutes. For immunoblotting, protein concentrations were normalized using the DC Protein  
537 Assay Kit (Bio-Rad), separated by SDS-PAGE, transferred onto Nitrocellulose membranes (Bio-  
538 Rad), and visualized using the Odyssey M Imaging System (LI-COR Biosciences).

539

### 540 **FLAG immunoprecipitations**

541 HEK 293T cells were seeded in 6-well plates at  $5 \times 10^5$  cells/well in DMEM for 24 h. The cells  
542 were then transiently transfected with the indicated constructs. After 48 h, the cells were  
543 harvested and lysed by sonication. Lysates were clarified by centrifugation at 21,000 x g for 5  
544 minutes. The soluble fractions were then normalized using the DC Protein Assay (BioRad). 100  
545  $\mu\text{L}$  of the lysates were combined with 100  $\mu\text{L}$  of 2x sample loading buffer and incubated at 95  $^{\circ}\text{C}$   
546 for 10 minutes. Equal protein amounts of the remaining sample lysates were loaded onto Pierce  
547 Micro-Spin Columns (Thermo Scientific) containing 100  $\mu\text{L}$  of anti-FLAG-M2 agarose resin  
548 (Sigma) and the samples were rotated end-over-end at 4 $^{\circ}\text{C}$  overnight. The samples were then

549 washed 3x with 1 column volume (350  $\mu$ L) of PBS. Proteins were eluted by rotating the resin at  
550 room temperature for 1 hour in 100  $\mu$ L of PBS containing 150 ng/  $\mu$ L 3 $\times$ -FLAG peptide (Sigma  
551 Aldrich). 100  $\mu$ L of 2x sample loading buffer was added to the eluate and samples were boiled  
552 at 95  $^{\circ}$ C for 10 minutes. Both lysates and eluates were analyzed by immunoblotting

553

#### 554 **LPS transfections of THP-1 cells**

555 THP-1 cells were resuspended in RPMI medium containing 50 ng/ml phorbol 12-myristate 12-  
556 acetate (PMA). Cells were plated in 12-well plates at a density of  $8 \times 10^5$  cells/well. After 24  
557 hours, the media was replaced with fresh RPMI/10% FBS containing 5  $\mu$ g/ml LPS and the cells  
558 were allowed to grow for another 24 h. The media was then replaced with Opti-MEM (0.5  
559 mls/well). Where indicated, cells were treated with ZVAD (40  $\mu$ M) or VX765 (40  $\mu$ M) 30 minutes  
560 before *LPS transfection*. *The LPS solution was prepared by adding LPS (25  $\mu$ g/mL final*  
561 *concentration) and FuGENE (0.5% final concentration) to Opti-MEM. This solution was gently*  
562 *mixed by flicking and incubated for 30 mins at room temperature before drop-wise addition to*  
563 *each well*. The supernatants were collected, and cells were lysed by sonication 24 h post  
564 transfection. Both supernatants and lysates were precipitated by chloroform/methanol and  
565 analyzed by immunoblotting.

566

#### 567 **Bacterial Infections**

##### 568 ***Salmonella* infection of Caco-2 cells**

569 *Salmonella* and *Legionella* infections were carried out as previously described<sup>25,54,55</sup>. Caco-2  
570 cells (HTB-27; American Type Culture Collection) were maintained in Dulbecco's modified  
571 Eagle's medium (DMEM) supplemented with 10% (vol/vol) heat-inactivated fetal bovine serum  
572 (FBS), 100 IU/mL penicillin and 100  $\mu$ g/mL streptomycin. Cells were grown at 37 $^{\circ}$ C in a  
573 humidified incubator with 5% CO<sub>2</sub>. One day prior to infection, Caco-2 cells were incubated with



574 0.25% trypsin-EDTA (Gibco) diluted 1:1 with 1 x PBS at 37°C for 15 min to dissociate cells.  
575 Trypsin was neutralized with serum-containing medium. 24 hours before infection, cells were  
576 replated in DMEM supplemented with 10% (vol/vol) heat-inactivated FBS without antibiotics in a  
577 24-well plate at a density of  $3 \times 10^5$  cells/well. 3 hours before infection, the media was replaced  
578 with Opti-MEM I reduced serum medium (Thermo Fisher Scientific) containing 100 ng/ml  
579 Pam3CSK4 (Invivogen) to prime the cells. An overnight culture of wild-type  
580 (WT) *Salmonella* Typhimurium (SL1344) was diluted into LB broth containing 300 mM NaCl and  
581 then grown for 3 hours at 37°C to induce SPI-1 expression. After induction, the culture was  
582 pelleted at  $6,010 \times g$  for 3 minutes, washed once with PBS, and then resuspended in PBS.  
583 Caco-2 cells were infected with WT *Salmonella* at a multiplicity of infection (MOI) of 60. Control  
584 cells were mock-infected with PBS. Cells were centrifuged at  $290 \times g$  for 10 min and incubated  
585 at 37°C. 1-hour post-infection, infected cells were treated with 100 ng/mL Gentamicin to kill any  
586 extracellular *Salmonella* and placed back to 37°C. The supernatants were collected, and cells  
587 were lysed by sonication 6 h post infection. Both supernatants and lysates were precipitated by  
588 chloroform/methanol and analyzed by immunoblotting.

#### 589 ***Legionella* infection of THP1 cells**

590 THP-1 cells in RPMI medium were plated in 12-well plates at a density of  $8 \times 10^5$  cells/well and  
591 differentiated with 40 ng/ml phorbol 12-myristate 12-acetate (PMA) for 24 h. The media was  
592 replaced with fresh RPMI/10% FBS (without PMA) and the cells were allowed to grow for  
593 another 24 h. The media was then replaced with Opti-MEM immediately before *Legionella*  
594 infection. The THP-1 cells were infected with a flagellin mutant,  $\Delta flaA$ , of *Legionella*  
595 *pneumophila*<sup>56</sup>, which is an Lp02 strain (*rpsL*, *hsdR*, *thyA*) derived from the serogroup 1 clinical  
596 isolate Philadelphia-1. *Legionella* was grown as a stationary patch on charcoal yeast extract  
597 agar plates at 37°C. After 48 hours, the bacteria were resuspended in PBS and added to the  
598 THP-1 cells at a MOI of 10. Infected THP-1s were centrifuged at  $400 \times g$  for 10 min and

599 incubated at 37°C for 7 hours. Control cells were mock-infected with PBS. The supernatants  
600 and cells were precipitated together by chloroform/methanol and analyzed by immunoblotting.

601

## 602 **Data analysis and statistics**

603 Statistical analysis was performed using GraphPad Prism 9.0 software and Microsoft Excel.

604 Statistical significance was determined using two-sided Student's *t*-tests.

605

## 606 **Author Contributions**

607 CYT conceived and directed the project, performed experiments, analyzed data, and wrote the  
608 manuscript. PE, CH, BD performed experiments and analyzed data. MSE, and JZ performed  
609 bacterial infections in Caco-2 cells. JL and TS performed cloning and generated plasmids. All  
610 authors read and approved the manuscript.

611

## 612 **Acknowledgements**

613 We thank all the rotation students, Brianna Hill-Payne, Reyna Garcia, and Ivanna Molina for  
614 their contributions to the lab set up and discussions. We thank Dr. Igor Brodsky for careful  
615 reading of this manuscript and providing feedback. This work was supported by a UNCF/BMS  
616 EE Just Early Career Investigator Award and NIH R00 Career Transition Award Grant#  
617 4R00AI148598-03 (CYT) and R01AI123243 and a Burroughs Wellcome Fund Investigator in the  
618 Pathogenesis of Infectious Disease Award (SS). MSE is supported by the National Science  
619 Foundation Graduate Fellowship DGE-1321851.

620

## 621 **References**

- 622 1. Broz, P. & Dixit, V. M. Inflammasomes: Mechanism of assembly, regulation and  
623 signalling. *Nat Rev Immunol* **16**, 407–420 (2016).  
624 2. Lamkanfi, M. & Dixit, V. M. Mechanisms and functions of inflammasomes. *Cell* **157**,  
625 1013–1022 (2014).

- 626 3. Shi, J. *et al.* Cleavage of GSDMD by inflammatory caspases determines pyroptotic cell  
627 death. *Nature* **526**, 660–665 (2015).
- 628 4. Kayagaki, N. *et al.* Caspase-11 cleaves gasdermin D for non-canonical inflammasome  
629 signalling. *Nature* **526**, 666–671 (2015).
- 630 5. He, W. T. *et al.* Gasdermin D is an executor of pyroptosis and required for interleukin-1 $\beta$   
631 secretion. *Cell Res* **25**, 1285–1298 (2015).
- 632 6. Ding, J. *et al.* Pore-forming activity and structural autoinhibition of the gasdermin family.  
633 *Nature* **535**, 111–116 (2016).
- 634 7. Liu, X. *et al.* Inflammasome-activated gasdermin D causes pyroptosis by forming  
635 membrane pores. *Nature* **535**, 153–158 (2016).
- 636 8. Sborgi, L. *et al.* GSDMD membrane pore formation constitutes the mechanism of  
637 pyroptotic cell death. *EMBO J* **35**, 1766–1778 (2016).
- 638 9. Boucher, D. *et al.* Caspase-1 self-cleavage is an intrinsic mechanism to terminate  
639 inflammasome activity. *Journal of Experimental Medicine* **215**, 827–840 (2018).
- 640 10. Guey, B., Bodnar, M., Manié, S. N., Tardivel, A. & Petrilli, V. Caspase-1 autoproteolysis is  
641 differentially required for NLRP1b and NLRP3 inflammasome function. *Proc Natl Acad*  
642 *Sci U S A* **111**, 17254–17259 (2014).
- 643 11. Broz, P., von Moltke, J., Jones, J. W., Vance, R. E. & Monack, D. M. Differential  
644 requirement for caspase-1 autoproteolysis in pathogen-induced cell death and cytokine  
645 processing. *Cell Host Microbe* **8**, 471–483 (2010).
- 646 12. Ball, D. P. *et al.* Caspase-1 interdomain linker cleavage is required for pyroptosis. *Life Sci*  
647 *Alliance* **3**, e202000664 (2020).
- 648 13. Ross, C., Chan, A. H., von Pein, J., Boucher, D. & Schroder, K. Dimerization and auto-  
649 processing induce caspase-11 protease activation within the non-canonical  
650 inflammasome. *Life Sci Alliance* **1**, (2018).
- 651 14. Lee, B. L. *et al.* Caspase-11 auto-proteolysis is crucial for noncanonical inflammasome  
652 activation. *Journal of Experimental Medicine* **215**, 2279–2288 (2018).
- 653 15. Liu, Z. *et al.* Caspase-1 Engages Full-Length Gasdermin D through Two Distinct  
654 Interfaces That Mediate Caspase Recruitment and Substrate Cleavage. *Immunity* **53**,  
655 106-114.e5 (2020).
- 656 16. Wang, K. *et al.* Structural Mechanism for GSDMD Targeting by Autoprocessed Caspases  
657 in Pyroptosis. *Cell* **180**, 941-955.e20 (2020).
- 658 17. Casson, C. N. *et al.* Human caspase-4 mediates noncanonical inflammasome activation  
659 against gram-negative bacterial pathogens. *Proc Natl Acad Sci U S A* **112**, 6688–6693  
660 (2015).
- 661 18. Shi, J. *et al.* Inflammatory caspases are innate immune receptors for intracellular LPS.  
662 *Nature* **514**, 187–192 (2014).
- 663 19. Hagar, J. A., Powell, D. A., Aachoui, Y., Ernst, R. K. & Miao, E. A. Cytoplasmic LPS  
664 activates caspase-11: Implications in TLR4-independent endotoxic shock. *Science (1979)*  
665 **341**, 1250–1253 (2013).
- 666 20. Kayagaki, N. *et al.* Noncanonical inflammasome activation by intracellular LPS  
667 independent of TLR4. *Science (1979)* **341**, (2013).
- 668 21. Akuma, D. C. *et al.* Noncanonical inflammasome assembly requires caspase-11 catalytic  
669 activity and intra-molecular autoprocessing. *bioRxiv* 2022.09.21.508824 (2022)  
670 doi:10.1101/2022.09.21.508824.
- 671 22. Kayagaki, N. *et al.* Non-canonical inflammasome activation targets caspase-11. *Nature*  
672 **479**, 117–121 (2011).
- 673 23. Rühl, S. & Broz, P. Caspase-11 activates a canonical NLRP3 inflammasome by  
674 promoting K<sup>+</sup>efflux. *Eur J Immunol* **45**, 2927–2936 (2015).
- 675 24. Wandel, M. P. *et al.* Guanylate-binding proteins convert cytosolic bacteria into caspase-4  
676 signaling platforms. *Nat Immunol* **21**, 880–891 (2020).

- 677 25. Naseer, N. *et al.* Salmonella enterica Serovar Typhimurium Induces NAIP/NLRC4- And  
678 NLRP3/ASC-Independent, Caspase-4-Dependent Inflammasome Activation in Human  
679 Intestinal Epithelial Cells. *Infect Immun* **90**, (2022).
- 680 26. Knodler, L. A. *et al.* Noncanonical inflammasome activation of caspase-4/caspase-11  
681 mediates epithelial defenses against enteric bacterial pathogens. *Cell Host Microbe* **16**,  
682 249–256 (2014).
- 683 27. Kobayashi, T. *et al.* The Shigella OspC3 effector inhibits caspase-4, antagonizes  
684 inflammatory cell death, and promotes epithelial infection. *Cell Host Microbe* **13**, 570–583  
685 (2013).
- 686 28. Bibo-Verdugo, B. *et al.* Resurrection of an ancient inflammatory locus reveals switch to  
687 caspase-1 specificity on a caspase-4 scaffold. *J Biol Chem* **298**, 101931 (2022).
- 688 29. Taabazuing, C. Y., Okondo, M. C. & Bachovchin, D. A. Pyroptosis and Apoptosis  
689 Pathways Engage in Bidirectional Crosstalk in Monocytes and Macrophages. *Cell Chem*  
690 *Biol* **24**, 507–514 (2017).
- 691 30. Davies, C. W. *et al.* Discovery of a caspase cleavage motif antibody reveals insights into  
692 noncanonical inflammasome function. *PNAS* **118**, e2018024118 (2021).
- 693 31. Silva, M. T. Secondary necrosis: The natural outcome of the complete apoptotic program.  
694 *FEBS Letters* vol. 584 4491–4499 Preprint at  
695 <https://doi.org/10.1016/j.febslet.2010.10.046> (2010).
- 696 32. Bibo-Verdugo, B., Snipas, S. J., Kolt, S., Poreba, M. & Salvesen, G. S. Extended subsite  
697 profiling of the pyroptosis effector protein gasdermin D reveals a region recognized by  
698 inflammatory caspase-11. *Journal of Biological Chemistry* **295**, 11292–11302 (2020).
- 699 33. Gonzalez Ramirez, M. L. *et al.* Extensive peptide and natural protein substrate screens  
700 reveal that mouse caspase-11 has much narrower substrate specificity than caspase-1.  
701 *Journal of Biological Chemistry* vol. 293 7058–7067 Preprint at  
702 <https://doi.org/10.1074/jbc.RA117.001329> (2018).
- 703 34. Wiggins, K. A. *et al.* IL-1 $\alpha$  cleavage by inflammatory caspases of the noncanonical  
704 inflammasome controls the senescence-associated secretory phenotype. *Aging Cell* **18**,  
705 (2019).
- 706 35. Riedl, S. J. & Salvesen, G. S. The apoptosome: Signalling platform of cell death. *Nature*  
707 *Reviews Molecular Cell Biology* vol. 8 405–413 Preprint at  
708 <https://doi.org/10.1038/nrm2153> (2007).
- 709 36. Puren, A. J., Fantuzzi, G. & Dinarello, C. A. Gene expression, synthesis, and secretion of  
710 interleukin 18 and interleukin 1 $\beta$  are differentially regulated in human blood mononuclear  
711 cells and mouse spleen cells. *Proc Natl Acad Sci U S A* **96**, 2256–2261 (1999).
- 712 37. Lin, X. Y., Choi, M. S. K. & Porter, A. G. Expression analysis of the human caspase-1  
713 subfamily reveals specific regulation of the CASP5 gene by lipopolysaccharide and  
714 interferon- $\gamma$ . *Journal of Biological Chemistry* **275**, 39920–39926 (2000).
- 715 38. Poreba, M., Strózyk, A., Salvesen, G. S. & Draąg, M. Caspase substrates and inhibitors.  
716 *Cold Spring Harb Perspect Biol* **5**, (2013).
- 717 39. Wannamaker, W. *et al.* (S)-1-((S)-2-[[1-(4-amino-3-chloro-phenyl)-methanoyl]-amino]-3,  
718 3-dimethyl-butanoyl)-pyrrolidine-2-carboxylic acid ((2R,3S)-2-ethoxy-5-oxo- tetrahydro-  
719 furan-3-yl)-amide (VX-765), an orally available selective interleukin (IL)-converting  
720 enzyme/caspase-1 inhibitor, exhibits potent anti-inflammatory activities by inhibiting the  
721 release of IL-1 $\beta$  and IL-18. *Journal of Pharmacology and Experimental Therapeutics* **321**,  
722 509–516 (2007).
- 723 40. Chan, A. H. & Schroder, K. Inflammasome signaling and regulation of interleukin-1 family  
724 cytokines. *Journal of Experimental Medicine* **217**, (2020).
- 725 41. Afonina, I. S., Müller, C., Martin, S. J. & Beyaert, R. Proteolytic Processing of Interleukin-  
726 1 Family Cytokines: Variations on a Common Theme. *Immunity* vol. 42 991–1004  
727 Preprint at <https://doi.org/10.1016/j.immuni.2015.06.003> (2015).

- 728 42. Taabazuing, C. Y., Griswold, A. R. & Bachovchin, D. A. The NLRP1 and CARD8  
729 inflammasomes. *Immunol Rev* **297**, 13–25 (2020).
- 730 43. Chui, A. J. *et al.* N-terminal degradation activates the NLRP1B inflammasome. *Science*  
731 (1979) **364**, 82–85 (2019).
- 732 44. Dick, M. S., Sborgi, L., Rühl, S., Hiller, S. & Broz, P. ASC filament formation serves as a  
733 signal amplification mechanism for inflammasomes. *Nat Commun* **7**, 1–12 (2016).
- 734 45. Poznanski, S. M. *et al.* Combined Stimulation with Interleukin-18 and Interleukin-12  
735 Potently Induces Interleukin-8 Production by Natural Killer Cells. *J Innate Immun* **9**, 511–  
736 525 (2017).
- 737 46. Ming Man, S. *et al.* Differential roles of caspase-1 and caspase-11 in infection and  
738 inflammation. *Sci Rep* **7**, (2017).
- 739 47. Chan, A. H. *et al.* Caspase-4 dimerisation and D289 auto-processing elicits an  
740 interleukin-1 $\beta$  converting enzyme. *bioRxiv* 2023.01.05.522955 (2023)  
741 doi:10.1101/2023.01.05.522955.
- 742 48. Ridker, P. M. *et al.* Effect of interleukin-1 $\beta$  inhibition with canakinumab on incident lung  
743 cancer in patients with atherosclerosis: exploratory results from a randomised, double-  
744 blind, placebo-controlled trial. *The Lancet* **390**, 1833–1842 (2017).
- 745 49. van der Poll, T., van de Veerdonk, F. L., Scicluna, B. P. & Netea, M. G. The  
746 immunopathology of sepsis and potential therapeutic targets. *Nature Reviews*  
747 *Immunology* vol. 17 407–420 Preprint at <https://doi.org/10.1038/nri.2017.36> (2017).
- 748 50. Devant, P., Cao, A. & Kagan, J. C. *Evolution-inspired redesign of the LPS receptor*  
749 *caspase-4 into an interleukin-1 $\beta$ -converting enzyme*. *Sci. Immunol* vol. 6  
750 <https://www.science.org> (2021).
- 751 51. Afonina, I. S. *et al.* Granzyme B-dependent proteolysis acts as a switch to enhance the  
752 proinflammatory activity of IL-1 $\alpha$ . *Mol Cell* **44**, 265–278 (2011).
- 753 52. Tsuchiya, K. *et al.* Gasdermin D mediates the maturation and release of IL-1 $\alpha$   
754 downstream of inflammasomes. *Cell Rep* **34**, (2021).
- 755 53. Johnson, D. C. *et al.* DPP8/DPP9 inhibitor-induced pyroptosis for treatment of acute  
756 myeloid leukemia. *Nat Med* **24**, 1151–1156 (2018).
- 757 54. Naseer, N. *et al.* Human NAIP/NLRC4 and NLRP3 inflammasomes detect Salmonella  
758 type III secretion system activities to restrict intracellular bacterial replication. *PLoS*  
759 *Pathog* **18**, (2022).
- 760 55. Zhang, J., Brodsky, I. E. & Shin, S. Yersinia Type III-Secreted Effectors Subvert  
761 Caspase-4-dependent Inflammasome Activation in Human Cells. *bioRxiv*  
762 2023.01.24.525473 (2023) doi:10.1101/2023.01.24.525473.
- 763 56. Ren, T., Zamboni, D. S., Roy, C. R., Dietrich, W. F. & Vance, R. E. Flagellin-deficient  
764 Legionella mutants evade caspase-1- and Naip5-mediated macrophage immunity. *PLoS*  
765 *Pathog* **2**, 0175–0183 (2006).
- 766

767

768

769

770 **FIGURES**

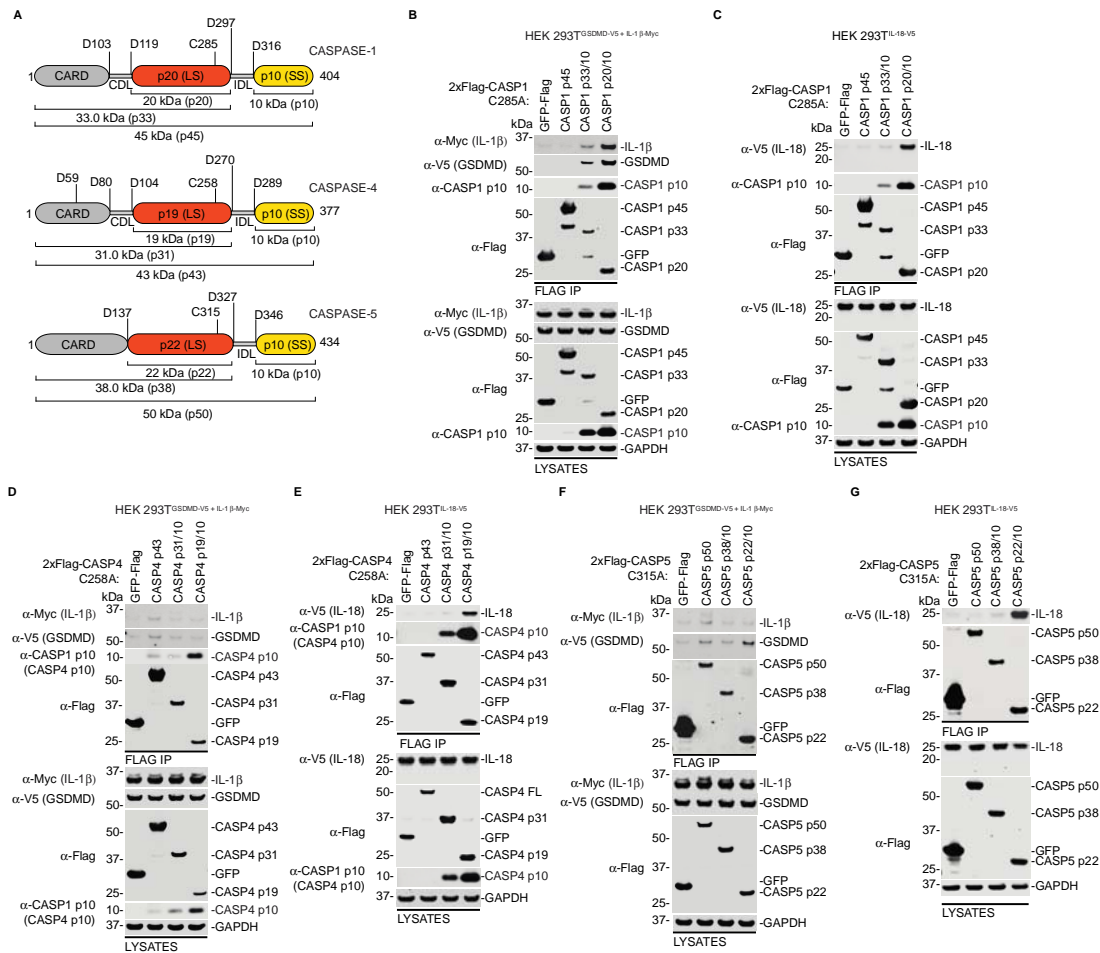

771

772 **Figure 1. The p20/10 species of human inflammatory caspases are the species that bind**

773 **strongly to inflammatory substrates (A) Schematic of human CASP1 (top), CASP4 (middle)**

774 **and CASP5 (bottom) depicting the catalytic cysteines and autoproteolytic sites that give rise to**

775 **the distinct caspase species. (B,D,F) HEK 293T cells stably expressing C-terminally V5-tagged**

776 **GSDMD (GSDMD-V5) and Myc-tagged IL-1 $\beta$  (IL-1 $\beta$ -Myc) were transiently transfected with the**

777 **indicated catalytically inactive caspase constructs. After 48 h, the cells were harvested and**

778 **subjected to anti-FLAG IP followed by immunoblot analysis. GFP control was C-terminally FLAG**

779 **tagged (GFP-FLAG) and the catalytically dead caspases all harbored an N-terminal 2xFLAG**

780 **tag. (C,E,G) HEK 293T cells stably expressing C-terminally V5-tagged IL-18 (IL-18-V5) were**

781 **transiently transfected with the indicated constructs as in B,D, and F for 48 h before the cells**

782 were harvested and subjected to anti-FLAG IP followed by immunoblotting. Data are  
783 representative of three or more independent experiments.

784

785

786

787

788

789

790

791

792

793

794

795

796

797

798

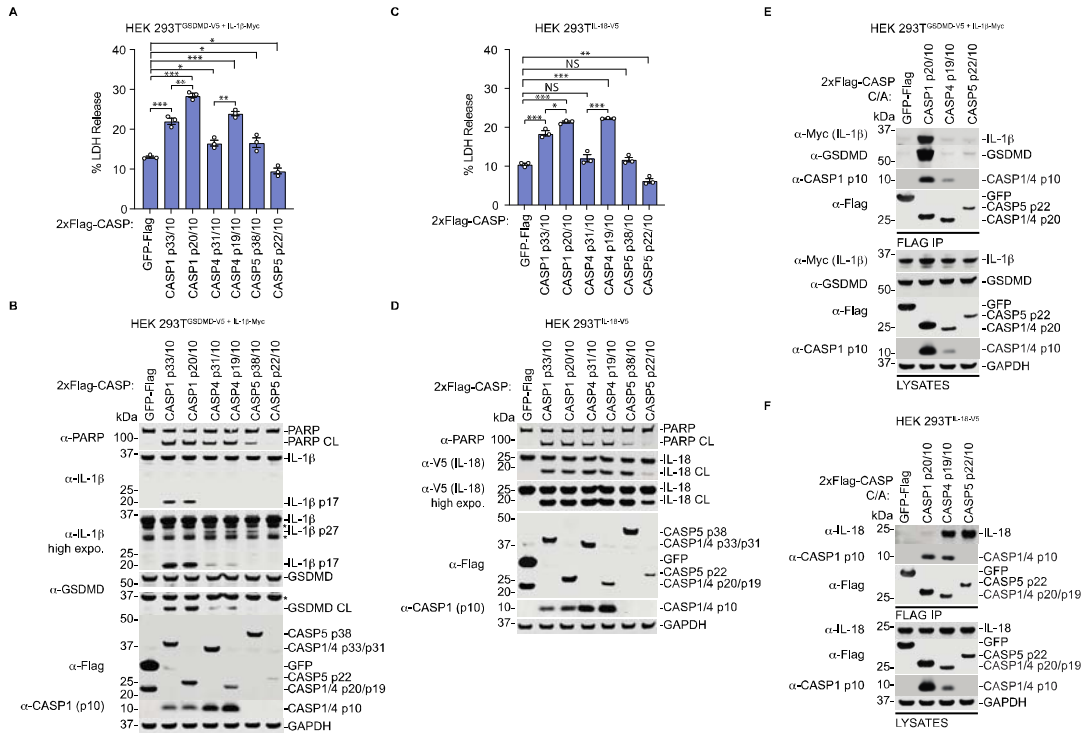

799

800 **Figure 2. CASP4/5 cleave IL-1 $\beta$  and IL-18.** (A,B) HEK 293T cells stably expressing GSDMD-  
 801 V5 and IL-1 $\beta$ -Myc were transiently transfected with the indicated constructs. After 24 h, samples  
 802 were analyzed for LDH release (A) and immunoblotting (B). (C,D) HEK 293T cells stably  
 803 expressing IL-18-V5 were transiently transfected with the indicated constructs. After 24 h,  
 804 samples were analyzed for LDH release (C) and immunoblotting (D). (E,F) HEK 293T cells  
 805 stably expressing GSDMD-V5 and IL-1 $\beta$ -Myc (E) or IL-18-V5 (F) were transfected with the  
 806 indicated catalytically inactive caspase constructs. After 48 h, the cells were harvested and  
 807 subjected to anti-FLAG IP followed by immunoblot analysis. Data are means  $\pm$  SEM of three  
 808 biological replicates. \*\*\*P < 0.001, \*\*P < 0.01 and \*P < 0.05 by two-sided Student's *t*-test  
 809 compared with control. \*Represents non-specific bands in immunoblots. Data are representative  
 810 of three or more independent experiments.



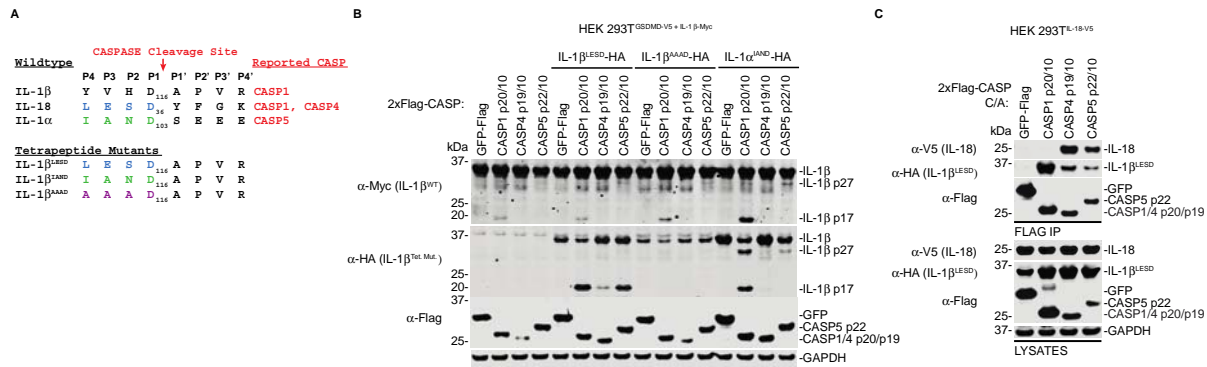

811

812 **Figure 3. The P4 – P1 tetrapeptide sequence of IL-1β regulates processing by CASP1/4/5.**

813 **(A)** Schematic depicting the sequence of wildtype IL-1β, IL-18, IL-1α, the caspases that were

814 reported to cleave these substrates, and the tetrapeptide mutants. **(B)** HEK 293T cells stably

815 expressing GSDMD-V5 and IL-1β-Myc were transiently co-transfected with the indicated

816 catalytically active caspase constructs and IL-1β tetrapeptide mutants (Tet. Mut.) for 24 h prior

817 to immunoblot analysis. **(C)** HEK 293T cells stably expressing IL-18-V5 were transiently co-

818 transfected with the indicated catalytically inactive (C/A) caspase constructs and the IL-1β

819 mutant, in which the tetrapeptide sequence was substituted for the sequence found in IL-18 (IL-

820 1β<sup>LESD</sup>). 48 h post transfection, samples were subjected to anti-FLAG immunoprecipitation

821 followed by immunoblot analysis. Data are representative of two or more independent

822 experiments.

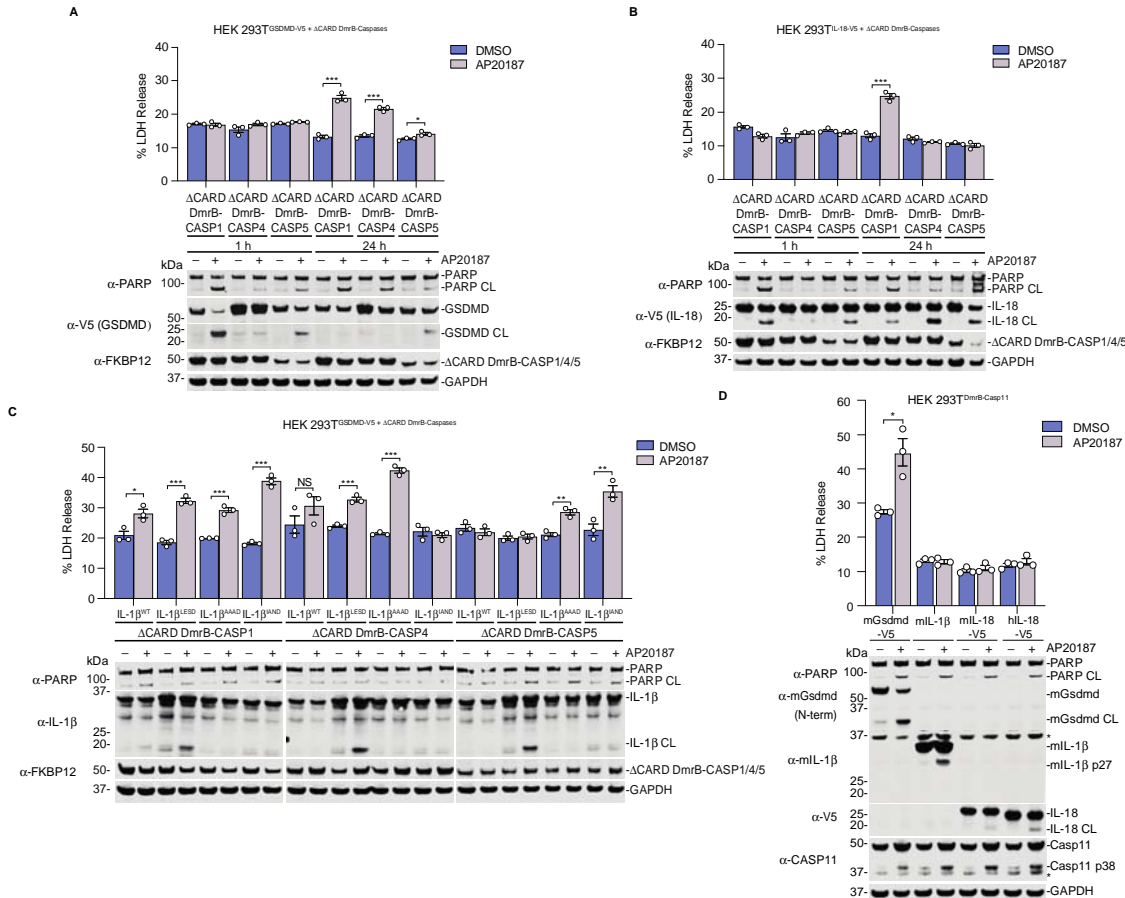

823  
 824 **Figure 4. Dimerization of  $\Delta$ CARD DmrB-CASP1/4/5/11 mediates processing of**  
 825 **inflammatory substrates. (A,B)** HEK 293T Cells stably expressing  $\Delta$ CARD DmrB-CASP1,-4,  
 826 or -5 and GSDMD-V5 (A) or IL-18-V5 (B) were treated with AP20187 (1  $\mu$ M) for 1 h or 24 h.  
 827 Cell death was measured by LDH and samples were analyzed by immunoblotting. (C) HEK  
 828 293T cells stably expressing  $\Delta$ CARD DmrB-CASP1,-4, or -5 and GSDMD-V5 were transiently  
 829 transfected with the indicated IL-1 $\beta$  constructs for 24 h before the addition of AP20187 (1  $\mu$ M)  
 830 for 24 h. Cell death was measured by LDH and samples were analyzed by immunoblotting. (D)  
 831 HEK 293T cells stably expressing  $\Delta$ CARD DmrB-CASP11 were transiently transfected with the  
 832 indicated constructs. After 24 h, samples were treated with AP20187 (1  $\mu$ M) for 24 h then  
 833 analyzed for LDH release and immunoblotting. Data are means  $\pm$  SEM of three biological  
 834 replicates. \*\*\*P < 0.001, \*\*P < 0.01 and \*P < 0.05 by two-sided Student's *t*-test compared with

835 control. \*Represents non-specific bands in immunoblot. Data are representative of two or more  
836 independent experiments.

837

838

839

840

841

842

843

844

845

846

847

848

849

850

851

852

853

854

855

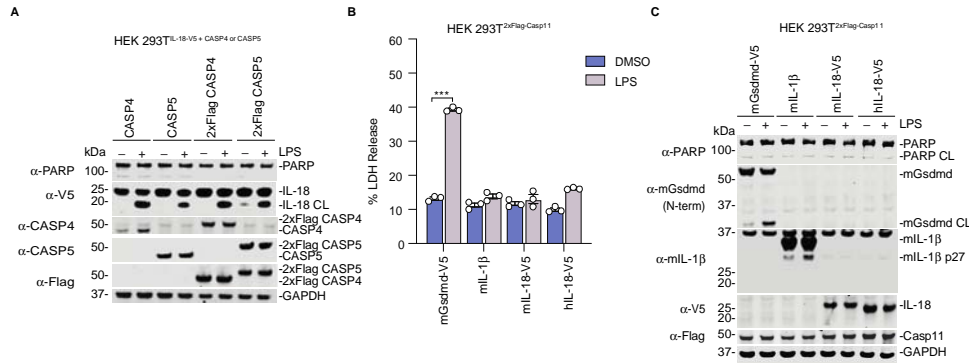

856

857 **Figure 5. LPS activated non-canonical inflammasomes cleave IL-1β and IL-18.** (A) HEK  
 858 293T cells stably expressing IL-18-V5 and either CASP4 or CASP5 were transfected with LPS  
 859 (25 μg/mL) for 24 h before samples were collected and analyzed by immunoblotting. (B,C) HEK  
 860 293T cells stably expressing 2xFLAG-CASP11 were transiently transfected with the indicated  
 861 constructs. After 24 h, samples were transfected with LPS (25 μg/mL) for 24 h then analyzed for  
 862 LDH release (B) and immunoblotting (C). Data are means ± SEM of three biological replicates.  
 863 \*\*\*P < 0.001, \*\*P < 0.01 and \*P < 0.05 by two-sided Student's *t*-test compared with control.  
 864 Data are representative of two or more independent experiments. \*Represents non-specific  
 865 bands in immunoblot. The small m or h represents mouse or human versions of the proteins  
 866 respectively.

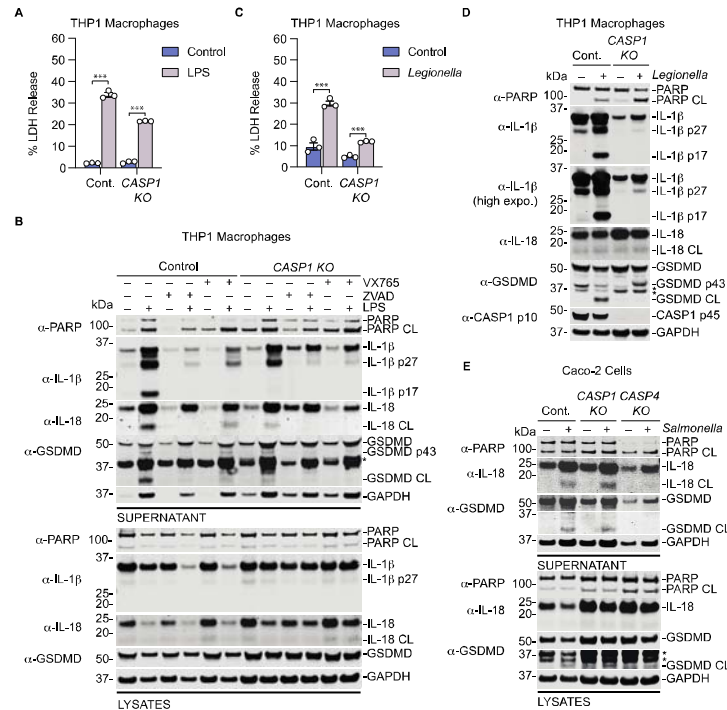

867

868 **Figure 6. Cytosolic LPS and pathogenic infections induce non-canonical inflammasome**

869 **mediated processing of inflammatory substrates in human macrophages and epithelial**

870 **cells. (A,B)** THP1 cells were terminally differentiated into macrophages with phorbol 12-

871 myristate 12-acetate (50 ng/mL) for 24 h and primed with LPS (5 µg/mL) for another 24 h.

872 Where indicated, THP1 macrophages were treated with ZVAD (40 µM) or VX765 (40 µM) 30

873 minutes before LPS transfections. Cells were then transfected with LPS (25 µg/mL). 24 h after

874 LPS transfection, samples were analyzed for LDH release **(A)** and immunoblotting **(B)**. **(C,D)**

875 THP1 cells were terminally differentiated into macrophages with phorbol 12-myristate 12-

876 acetate (40 ng/mL) for 48 h. Cells were then treated with *Legionella pneumophila* (MOI = 20) for

877 7 h before the supernatants were analyzed for LDH release **(C)** and then combined with the

878 lysates for immunoblotting **(D)**. € Caco-2 cells were primed with 100 ng/ml Pam3CSK4 for 3 h,

879 then infected with *Salmonella* Typhimurium (MOI = 60) for 6 h. Cells and their supernatants

880 were collected separately, samples were precipitated, and analyzed by immunoblotting. Data

881 are means ± SEM of three biological replicates. \*\*\*P < 0.001 and \*\*P < 0.01 by two-sided

882 Student's *t*-test compared with control. \*Represents non-specific bands in immunoblot. Data are  
883 representative of two or more independent experiments.

884

885

886

887

888

889

890

891

892

893

894

895

896

897

898

899

900

901

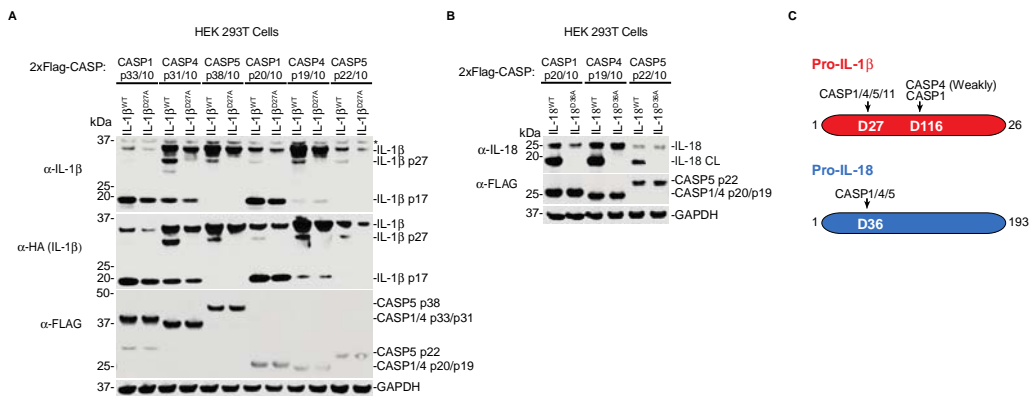

902  
 903 **Figure 7. CASP4/5 preferentially cleave IL-1 $\beta$  at D27 and IL-18 at D36.** (A,B) HEK 293T cells  
 904 were transiently co-transfected with the indicated constructs. After 24 h, samples were  
 905 harvested and analyzed by immunoblotting. (C) Schematic of inflammatory substrates and  
 906 representative cleavage sites by inflammatory caspases. Data are representative of three or  
 907 more independent experiments. \*Represents non-specific bands in immunoblot.

908

909

910

911

912

913

914

915

916

917

918

919

920

921

922 **SUPPLEMENTAL FIGURES**

923 **Supplemental Figure S1.**

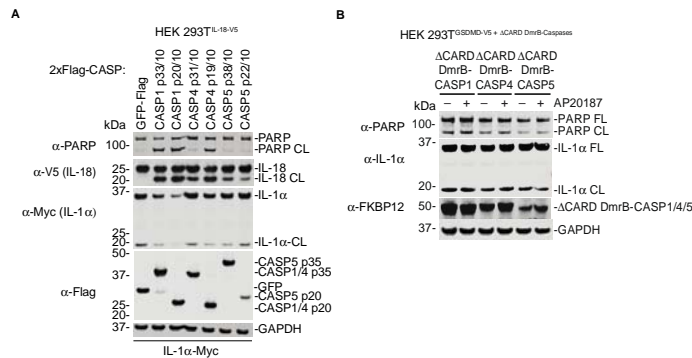

924

925 **Figure S1. CASP1/4/5 do not cleave IL-1α.** (A) HEK 293T cells stably expressing IL-18-V5  
 926 were transiently transfected with the indicated constructs. After 24 h, samples were then  
 927 harvested and analyzed by immunoblotting. (B) HEK 293T cells stably expressing GSDMD-V5  
 928 and either ΔCARD DmrB-CASP1, -4, or -5 were transiently transfected with a plasmid coding for  
 929 wildtype IL-1α for 24 h. Samples were then treated with AP20187 (1 μM) for 24 h and analyzed  
 930 by immunoblotting. Data are representative of three or more independent experiments.
